# Supplementary material for: Enzyme/pH-sensitive nanoparticles based on poly(β-l-malic acid) for drug delivery with enhanced endocytosis
Source: Royal Society of Chemistry journal article supplement (doi:10.1039/d4tb01681e), 2024-01-01
Supplement: d4tb01681e1.pdf [file d4tb01681e1.pdf]

( Supplementary information )

**Enzyme/pH-Sensitive nanoparticles based on Poly ( $\beta$ -L-malic acid) for drug delivery with enhanced endocytosis**

Songyan Guo<sup>a,b\*</sup>, Youbei Qiao<sup>b</sup>, Chaoli Wang<sup>b</sup>, Yuming Zhang<sup>a</sup>, TieHong Yang<sup>b</sup> and Hong Wu<sup>b\*</sup>

<sup>a</sup>Department of Scientific Research, Shaanxi Provincial People's Hospital, Youyi West Street NO.256, Xi'an 710068, People's Republic of China.

<sup>b</sup> Department of Pharmaceutical Analysis, School of Pharmacy, Air Force Medical University, 169 West Changle Street, Xi'an 710032, People's Republic of China.

Correspondent author: Songyan Guo and Hong Wu.

E-mail addresses: [spphgsy@126.com](mailto:spphgsy@126.com) (Songyan Guo), [hongwuxa@163.com](mailto:hongwuxa@163.com) (Hong Wu).

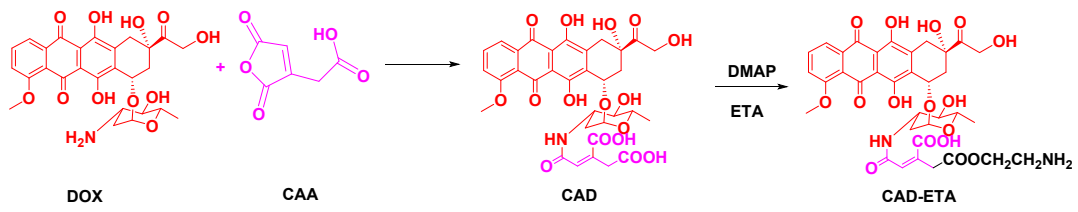

**Scheme. S1** Synthesized of CAD and CAD-ETA

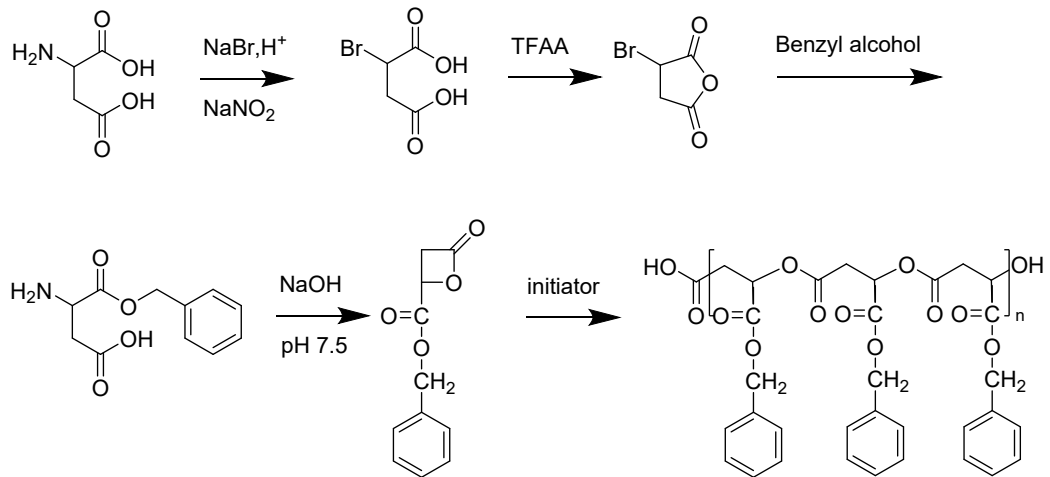

**Scheme. S2** Synthesized of PBM

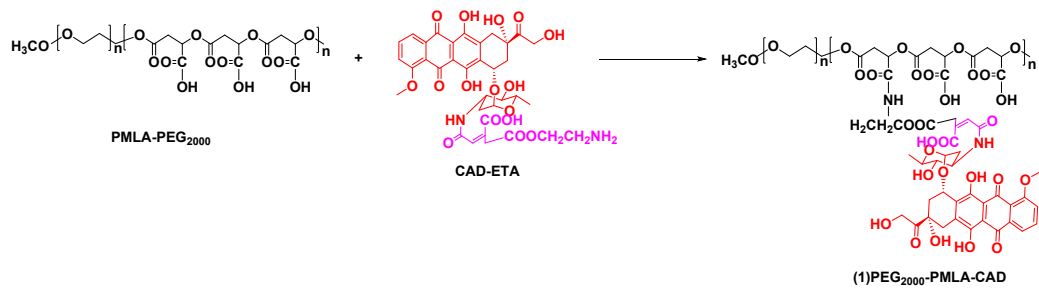

**Scheme. S3** Synthesized of PPC

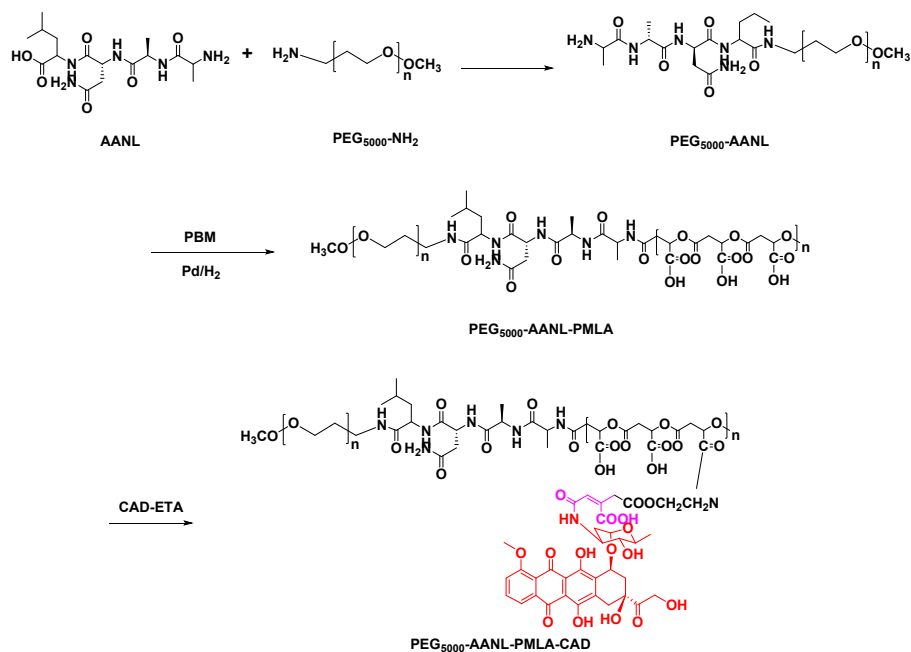

**Scheme. S4** Synthesized of PAPC

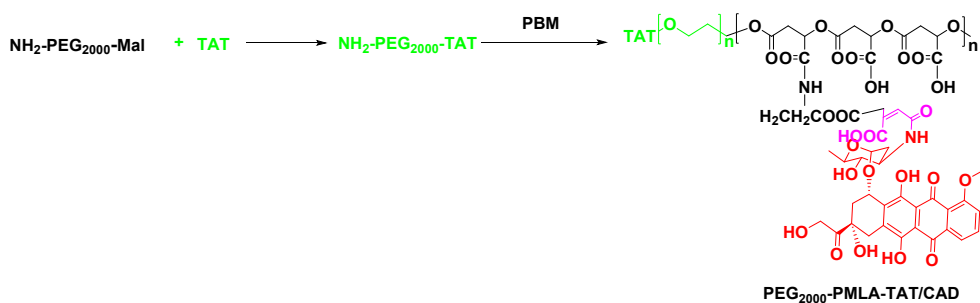

**Scheme. S5** Synthesized of PPTC

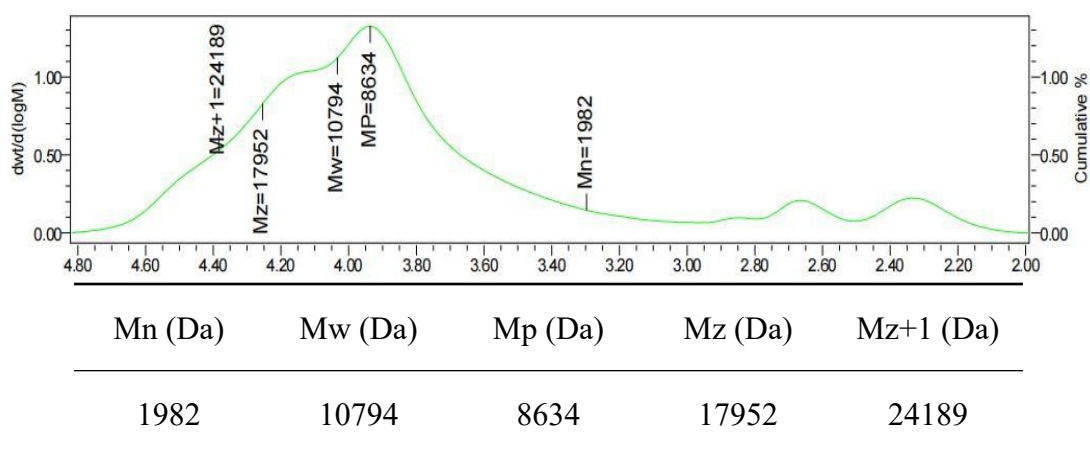

**Fig. S1** The GPC chromatography of PMLA.

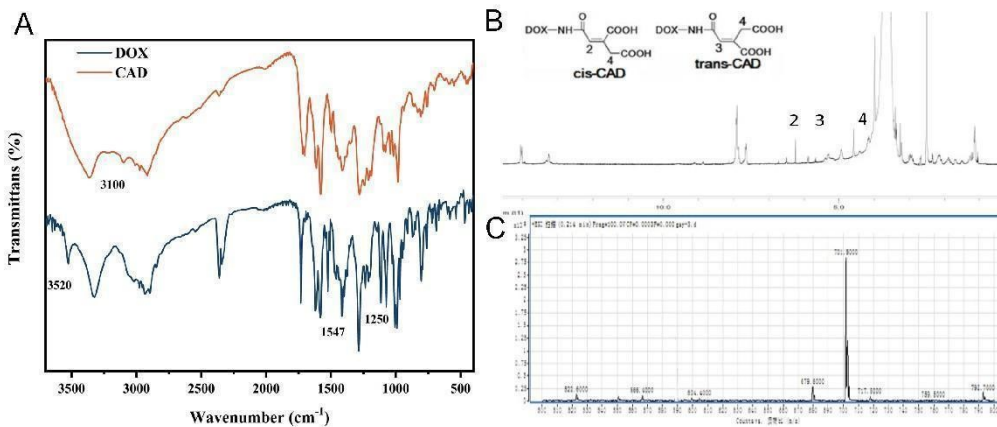

**Fig. S2** FTIR (A), <sup>1</sup>H NMR (400 MHz) (B) and MS(C) spectrum of CAD

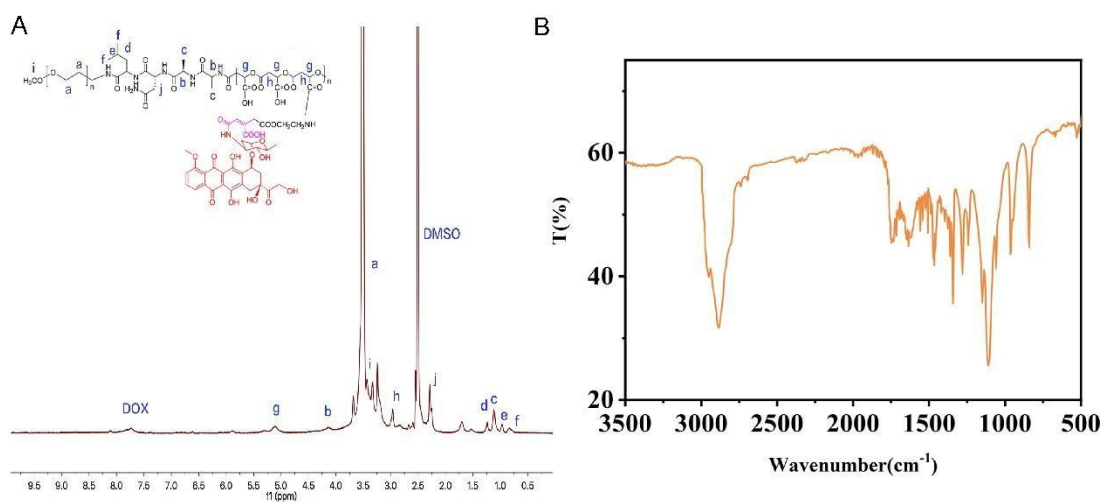

**Fig. S3** <sup>1</sup>H-NMR (400 MHz) (A) and FTIR(B) spectrum of PEG-AANL-PMLA-CAD(PAPC)

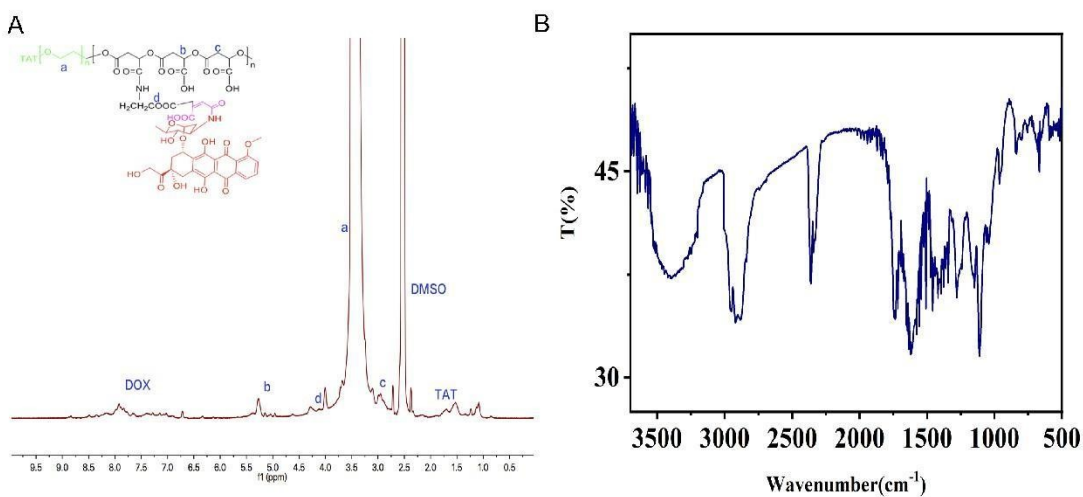

**Fig. S4**  $^1\text{H-NMR}$  (400 MHz) (A) and FTIR (B) spectrum of TAT-PEG-PMLA-CAD (PPTC)

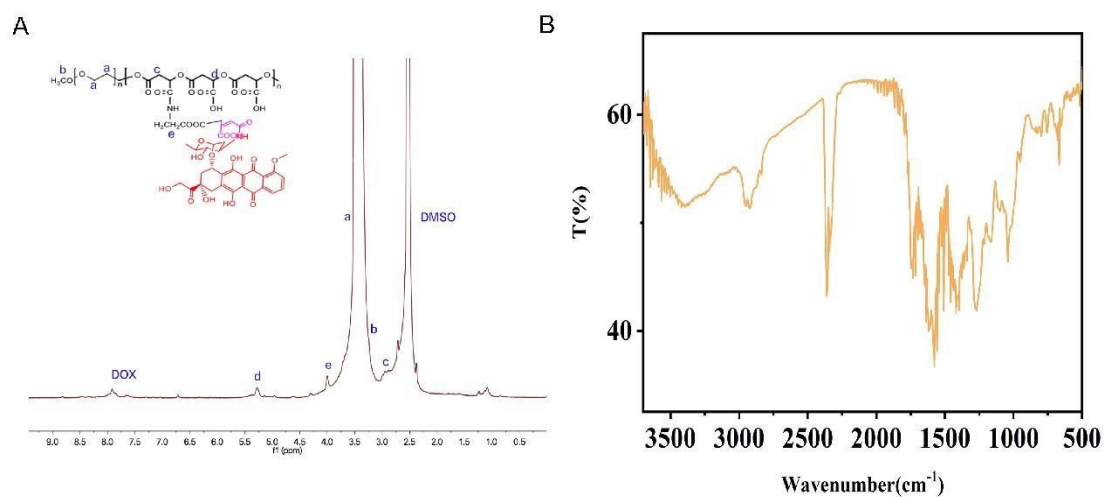

**Fig. S5**  $^1\text{H-NMR}$  (400 MHz) (A) and FTIR(B) spectrum of PEG-PMLA-CAD(PPC)

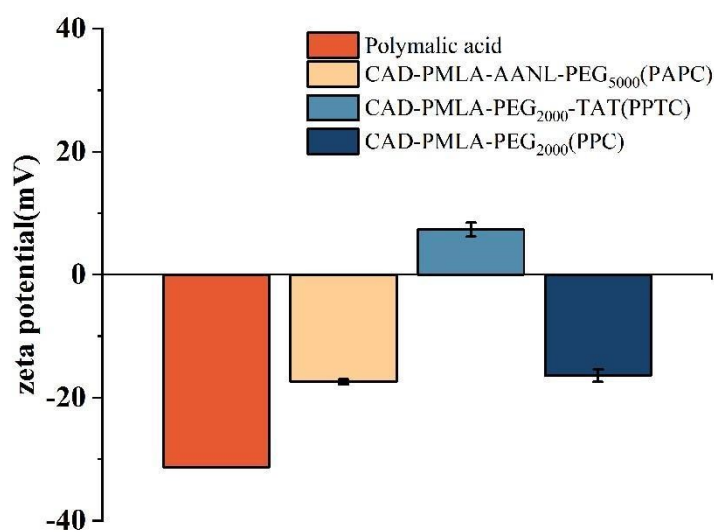

**Fig. S6** The zeta potential of different DOX-loaded nanomaterials

**Table. S1** Summary of size, Zeta-potential, PDI, and DOX drug content of EP-NPs, P-NPs, E-NPs and C-NPs.

| Nanoparticles | Size      | PDI* | Zeta-potential | DOX content |
|---------------|-----------|------|----------------|-------------|
|               | (nm)      |      | (mV)           |             |
| EP-NPs        | 129.7±3.5 | 0.19 | -17.63±1.06    | 25.3        |
| P-NPs         | 116.9±2.6 | 0.12 | -16.89±0.63    | 24.2        |
| E-NPs         | 143.1±3.2 | 0.19 | -16.65±1.51    | 21.6        |
| C-NPs         | 132.0±4.2 | 0.17 | -15.89±1.15    | 24.1        |

\*PDI: Polydispersity Index.

**Table. S2** Summary of IC<sub>50</sub> value of Free DOX, EP-NPs, P-NPs, E-NPs and C-NPs against MDA-MB-231 cells and L929.

|          | MDA-MB-231 (µg/mL)        |                           | L929 (µg/mL)              |                           |
|----------|---------------------------|---------------------------|---------------------------|---------------------------|
|          | IC <sub>50</sub> (pH 7.4) | IC <sub>50</sub> (pH 6.3) | IC <sub>50</sub> (pH 7.4) | IC <sub>50</sub> (pH 6.3) |
| Free-DOX | 0.92                      | 0.96                      | 1.22                      | 1.31                      |
| EP-NPs   | 27.52                     | 1.08                      | 31.22                     | 9.12                      |
| P-NPs    | 27.43                     | 4.03                      | 33.54                     | 9.97                      |
| E-NPs    | 27.99                     | 17.24                     | 36.21                     | 10.16                     |
| C-NPs    | 29.15                     | 19.13                     | 34.11                     | 16.22                     |
